# Supplementary material for: Polychlorinated Biphenyls in the Snow Cover of South-Eastern Kazakhstan
Source: MDPI journal article supplement (doi:10.3390/app12178660), 2022-08-29
Supplement: s1 [file s1]

## Supplementary Material 1 Example of a chromatogram report

from 31.05.2018

PCM measurement

Duration 50 minutes

Illustrated chromatogram current

detector response, mV

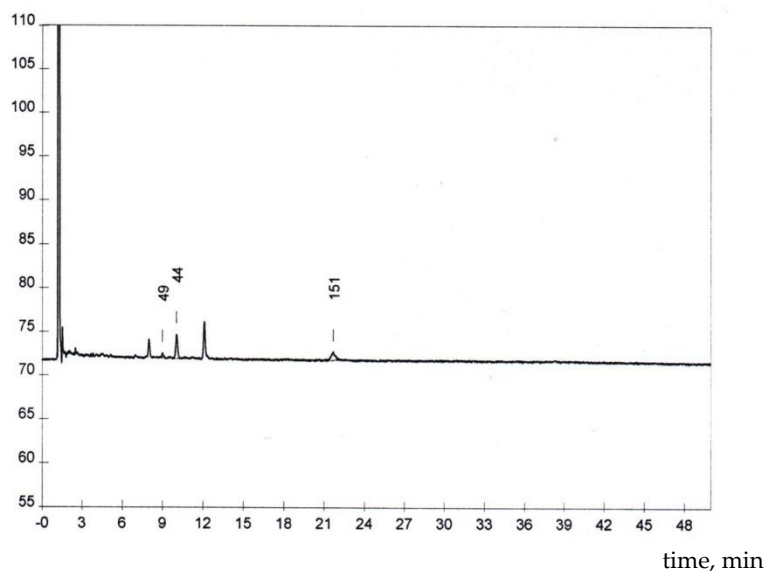

### Sample

Snow sample number 19 (city of Talgar)

Measuring date: 05.05.2018

Chemist: Izat A. N.

### Method

PCB determination

### Measurement

Number:0 grain size: 0  $\mu\text{m}$

Inner diameter: 0.32 mm; length: 30 m

Temperature conditions Measurements = 195.0 (50.0) Volatility- 1 = 250.0 TID 1 = 330.0 Volatility- 2 = 240.0 EZD-2 = 300.0

Main Parameter 1. Nitrogen P = 0.500; 2. Nitrogen Q = 5.000; 3. Nitrogen P = 1.200; 4. Nitrogen Q = 20.000; 5. Nitrogen Q = 25.000; 6. Nitrogen Q = 30.000; 7. Hydrogen Q = 12.000; 8. Air Q = 150.000

### Components

| Number | Time<br>min | Hight<br>mV | Area<br>mV/min | Concentration | Unit  | Component | Group |
|--------|-------------|-------------|----------------|---------------|-------|-----------|-------|
| 1      | 9.008       | 0.586       | 0.078          | 3.694e-006    | mg/mL | 49        | PCB   |
| 2      | 10.052      | 2.828       | 0.472          | 2.858e-005    | mg/mL | 44        | PCB   |
| 3      | 21.704      | 0.985       | 0.336          | 1.284e-005    | mg/mL | 151       | PCB   |

### Groups

| Number | Hight<br>mV | Area<br>mV/min | Concentration | Group |
|--------|-------------|----------------|---------------|-------|
| 1      | 4.399       | 0.885          | 4.511e-005    | PCB   |
